# Supplementary material for: Genomic Evaluation of Thermoanaerobacter spp. for the Construction of Designer Co-Cultures to Improve Lignocellulosic Biofuel Production
Source: PLoS One. 2013 Mar 26;8(3):e59362. doi: 10.1371/journal.pone.0059362 (PMC3608648; doi:10.1371/journal.pone.0059362)
Supplement: Table S2 — All CAZyme designated gene sequences within sequenced Thermoanaerobacter strains as are available within the CAZy database or identified through de novo analysis. (XLS) [file pone.0059362.s003.xls]

## Sheet: Sheet1
Table S2. All CAZyme designated gene sequences within sequenced Thermoanaerobacter strains as are available within the CAZy database or identified through de novo analysis.
		Clade 1						Clade 2		Clade 3
Designation	Modular Structure	T. brockii subsp. finnii Ako-1	T. ethanolicus CCSD1	T. pseudethanolicus 39E	Thermoanaerobacter sp. X513	Thermoanaerobacter sp. X514	Thermoanaerobacter sp. X561	T. italicus Ab9	T. mathranii subsp. mathranii A3	T. siderophilus SR4	T. thermohydrosulfuricus WC1	T. wiegelii Rt8.B1
Glycoside Hydrolase	GH1	Thebr_1974	TeCCSD1DRAFT_0480	Teth39_1927	Thet_0309	Teth514_0267	Teth561DRAFT_0798	Thit_0299	Tmath_0374	ThesiDRAFT1_0211	TthWC1_0924	Thewi_00009970
		Thebr_1990	TeCCSD1DRAFT_0641	Teth39_1943				Thit_0319	Tmath_0390	ThesiDRAFT1_0228	TthWC1_0925	Thewi_00011820
		Thebr_2098		Teth39_2054					Tmath_0668	ThesiDRAFT1_0229	TthWC1_0946
	GH2	Thebr_0629	TeCCSD1DRAFT_0113	Teth39_0611	Thet_1818	Teth514_1095	Teth561DRAFT_0370	Thit_0318	Tmath_0246	ThesiDRAFT1_0212	TthWC1_0945	Thewi_00011810
		Thebr_1975	TeCCSD1DRAFT_0642	Teth39_1928				Thit_1715	Tmath_0389	ThesiDRAFT1_0520	TthWC1_2247	Thewi_00027750
									Tmath_1704
	GH3	Thebr_2099		Teth39_2055	Thet_0220	Teth514_0182	Teth561DRAFT_1798	Thit_0198	Tmath_0257	ThesiDRAFT1_0351	TthWC1_1005	Thewi_00009950
								Thit_0201	Tmath_0275
	GH4	Thebr_1991	TeCCSD1DRAFT_0481	Teth39_1944	Thet_0441	Teth514_0266	Teth561DRAFT_0799	Thit_0297	Tmath_0373	ThesiDRAFT1_0230	TthWC1_0923	Thewi_00011400
			TeCCSD1DRAFT_0991		Thet_0308	Teth514_0394		Thit_1733		ThesiDRAFT1_0537
	GH5	Thebr_2228		Teth39_2182	Thet_0061	Teth514_1790	Teth561DRAFT_2282	Thit_0052	Tmath_01114	ThesiDRAFT1_1337	TthWC1_2422	Thewi_00008370
	GH10							Thit_0188	Tmath_0247
	GH13	Thebr_0686	TeCCSD1DRAFT_2194	Teth39_0668	Thet_1730	Teth514_1180	Teth561DRAFT_0537	Thit_0423	Tmath_0505	ThesiDRAFT1_0440	TthWC1_1721	Thewi_00026800
								Thit_1644	Tmath_1634
	GH15	Thebr_0272	TeCCSD1DRAFT_1760	Teth39_0265	Thet_2160	Teth514_0758	Teth561DRAFT_2180			ThesiDRAFT1_0423	TthWC1_0531	Thewi_00003840
										ThesiDRAFT1_0904	TthWC1_1704
	GH18	Thebr_1512	TeCCSD1DRAFT_0413	Teth39_1477	Thet_0776	Teth514_1268	Teth561DRAFT_0454	Thit_0805	Tmath_0844	ThesiDRAFT1_1167	TthWC1_1152	Thewi_00006510
			TeCCSD1DRAFT_1998		Thet_1641	Teth514_2159	Teth561DRAFT_0627	Thit_1372	Tmath_2187	ThesiDRAFT1_1536	TthWC1_1569	Thewi_00017580
								Thit_2291	Tmath_2202	ThesiDRAFT1_1964	TthWC1_1811	Thewi_00025470
											TthWC1_1971
	GH23	Thebr_2270	TeCCSD1DRAFT_0403	Teth39_2229	Thet_0781	Teth514_0717	Teth561DRAFT_0444	Thit_0813	Tmath_0858	ThesiDRAFT1_1826	TthWC1_1791	Thewi_00017730
		Thebr_1502	TeCCSD1DRAFT_0408	Teth39_1467	Thet_0786	Teth514_2149	Teth561DRAFT_0449	Thit_0819		ThesiDRAFT1_1979	TthWC1_1797	Thewi_00017810
		Thebr_1507		Teth39_1472	Thet_2205	Teth514_2154	Teth561DRAFT_0751
	GH26							Thit_2257				Thewi_00006070
	GH28							Thit_1735		ThesiDRAFT1_0531
										ThesiDRAFT1_0539
	GH31	Thebr_0006	TeCCSD1DRAFT_0865	Teth39_0006	Thet_0006	Teth514_0006	Teth561DRAFT_1294	Thit_0006	Tmath_0006	ThesiDRAFT1_1264	TthWC1_0758	Thewi_00007570
									Tmath_1715
	GH32	Thebr_0646	TeCCSD1DRAFT_1497	Teth39_0628	Thet_1795	Teth514_1118	Teth561DRAFT_1504	Thit_1689	Tmath_1673	ThesiDRAFT1_0495		Thewi_00027380
								Thit_2104
								Thit_2107
								Thit_2108
	GH36	Thebr_0628		Teth39_0610	Thet_1819	Teth514_1094	Teth561DRAFT_0369	Thit_1716	Tmath_1705	ThesiDRAFT1_0521	TthWC1_2246	Thewi_00027760
	GH38	Thebr_0630	TeCCSD1DRAFT_0114	Teth39_0612	Thet_1817	Teth514_1096	Teth561DRAFT_0371	Thit_0527	Tmath_1702
			TeCCSD1DRAFT_0121				Teth561DRAFT_0377	Thit_1713
			TeCCSD1DRAFT_2175
	GH43								Tmath_1695
	GH51								Tmath_1690
									Tmath_1691
	GH52							Thit_0190	Tmath_0249		TthWC1_1012
	GH65	Thebr_1548	TeCCSD1DRAFT_0448	Teth39_1512	Thet_0733	Teth514_2193	Teth561DRAFT_0489	Thit_0754	Tmath_0796	ThesiDRAFT1_1919	TthWC1_0336	Thewi_00017040
		Thebr_1557	TeCCSD1DRAFT_0457	Teth39_1521	Thet_0742	Teth514_2202	Teth561DRAFT_0498	Thit_0764	Tmath_0805	ThesiDRAFT1_1928	TthWC1_0345	Thewi_00017140
	GH66	Thebr_0271	TeCCSD1DRAFT_1759	Teth39_0264	Thet_2159	Teth514_0757	Teth561DRAFT_2179			ThesiDRAFT1_0903	TthWC1_0530
		Thebr_0273	TeCCSD1DRAFT_17614	Teth39_0266	Thet_2161	Teth514_0759	Teth561DRAFT_2181			ThesiDRAFT1_0905	TthWC1_0532
			TeCCSD1DRAFT_17624
	GH67							Thit_0189	Tmath_0248
	GH94		TeCCSD1DRAFT_09504
	GH105							Thit_1739		ThesiDRAFT1_0543
	GH123
	GH127								Tmath_1689
	GH130		TeCCSD1DRAFT_20714	Teth39_2180	Thet_0062	Teth514_1788	Teth561DRAFT_21724			ThesiDRAFT1_1338	TthWC1_2423	Thewi_00008380
				Teth39_2181	Thet_0063	Teth514_1789	Teth561DRAFT_22804			ThesiDRAFT1_1339	TthWC1_2424	Thewi_00008390
						Teth514_18024	Teth561DRAFT_2281
							Teth561DRAFT_24264
Glycosyltransferase	GT2	Thebr_0728	TeCCSD1DRAFT_0207	Teth39_0707	Thet_1249	Teth514_1549	Teth561DRAFT_0045	Thit_0646	Tmath_0952	ThesiDRAFT1_0033	TthWC1_0123	Thewi_00003930
		Thebr_1139	TeCCSD1DRAFT_1475	Teth39_1112	Thet_1354	Teth514_1651	Teth561DRAFT_0148	Thit_0650	Tmath_1156	ThesiDRAFT1_1492	TthWC1_0214	Thewi_00015840
		Thebr_1244	TeCCSD1DRAFT_2016	Teth39_1215			Teth561DRAFT_06414	Thit_1101	Tmath_1244	ThesiDRAFT1_2290	TthWC1_1168	Thewi_00015850
		Thebr_1672		Teth39_1630				Thit_1193		ThesiDRAFT1_2385		Thewi_00020880
		Thebr_1673		Teth39_1631				Thit_15914				Thewi_00021940
												Thewi_00026280
	GT4	Thebr_1674	TeCCSD1DRAFT_0538	Teth39_1632	Thet_0065	Teth514_0212	Teth561DRAFT_0905	Thit_0056	Tmath_0115	ThesiDRAFT1_0312	TthWC1_0445	Thewi_00008410
		Thebr_2050	TeCCSD1DRAFT_1809	Teth39_2001	Thet_0252	Teth514_1786	Teth561DRAFT_0908	Thit_0233	Tmath_0317	ThesiDRAFT1_1341	TthWC1_1234	Thewi_00010450
		Thebr_2224	TeCCSD1DRAFT_1810	Teth39_2178	Thet_0650	Teth514_2278	Teth561DRAFT_0909	Thit_0644	Tmath_0722	ThesiDRAFT1_1780	TthWC1_2426	Thewi_00015790
			TeCCSD1DRAFT_1811		Thet_0651	Teth514_2281	Teth561DRAFT_0910	Thit_0645	Tmath_0930	ThesiDRAFT1_1782	TthWC1_2514	Thewi_00018560
			TeCCSD1DRAFT_1814		Thet_0652	Teth514_2282	Teth561DRAFT_0996	Thit_0651		ThesiDRAFT1_1784
			TeCCSD1DRAFT_1816		Thet_0654	Teth514_2283	Teth561DRAFT_1844	Thit_0888		ThesiDRAFT1_1786
			TeCCSD1DRAFT_2069				Teth561DRAFT_2170			ThesiDRAFT1_2609
							Teth561DRAFT_23074
	GT26							Thit_1850	Tmath_1825	ThesiDRAFT1_0664	TthWC1_2592	Thewi_00000430
	GT28	Thebr_0835	TeCCSD1DRAFT_1390	Teth39_0813	Thet_0928	Teth514_2009	Teth561DRAFT_1203	Thit_1482	Tmath_1473	ThesiDRAFT1_2005	TthWC1_2119	Thewi_00024540
	GT35	Thebr_0714	TeCCSD1DRAFT_1799	Teth39_0695	Thet_1701	Teth514_1209	Teth561DRAFT_0566	Thit_1602	Tmath_1593	ThesiDRAFT1_1472	TthWC1_1101	Thewi_00026440
	GT51	Thebr_2026	TeCCSD1DRAFT_0509	Teth39_1978	Thet_0284	Teth514_0242	Teth561DRAFT_0824	Thit_0273	Tmath_0351	ThesiDRAFT1_0256	TthWC1_0895	Thewi_00011030
	GT84		TeCCSD1DRAFT_09494
	GT4,GT4,GT2											Thewi_00013640
	GTnc1					Teth514_1332			Tmath_0719
									Tmath_0954
Carbohydrate esterase	CE1								Tmath_1399
	CE4	Thebr_0547	TeCCSD1DRAFT_0019	Teth39_0532	Thet_1262	Teth514_1016	Teth561DRAFT_0135	Thit_1180	Tmath_1231	ThesiDRAFT1_0616	TthWC1_0136	Thewi_00017610
		Thebr_1231	TeCCSD1DRAFT_0221	Teth39_1202	Thet_1900	Teth514_1638	Teth561DRAFT_0291	Thit_1804	Tmath_1784	ThesiDRAFT1_1967	TthWC1_1340	Thewi_00021790
										ThesiDRAFT1_2303	TthWC1_1808	Thewi_00029030
	CE7							Thit_0191	Tmath_0250		TthWC1_1011
	CE9	Thebr_2077	TeCCSD1DRAFT_0571	Teth39_2028	Thet_0222	Teth514_0184	Teth561DRAFT_1796	Thit_0203	Tmath_0287	ThesiDRAFT1_0349	TthWC1_1272	Thewi_00010020
	CE14								Tmath_0279
Polysaccharide Lyase	PL9							Thit_1727
Carbohydrate Binding Modules2	CBM35											Thewi_00003850
	CBM50	Thebr_0489	TeCCSD1DRAFT_0445	Teth39_0477	Thet_0745	Teth514_0954	Teth561DRAFT_0486	Thit_0771	Tmath_0809	ThesiDRAFT1_0681	TthWC1_0332	Thewi_00017180
		Thebr_1544	TeCCSD1DRAFT_0921	Teth39_1508	Thet_1963	Teth514_2190	Teth561DRAFT_1235	Thit_1866	Tmath_1841	ThesiDRAFT1_1190	TthWC1_0831	Thewi_00001280
			TeCCSD1DRAFT_1330				Teth561DRAFT_1381			ThesiDRAFT1_1932	TthWC1_1154
			TeCCSD1DRAFT_2000								TthWC1_2211
											TthWC1_2361
	CBM50,CBM50	Thebr_1014	TeCCSD1DRAFT_1443	Teth39_0988	Thet_1319	Teth514_1429	Teth561DRAFT_0080	Thit_0977	Tmath_1032	ThesiDRAFT1_2534	TthWC1_0183	Thewi_00019380
		Thebr_1174	TeCCSD1DRAFT_2077	Teth39_1146	Thet_1473	Teth514_1583	Teth561DRAFT_1073				TthWC1_2346	Thewi_00021250
	CBM50,CBM50,CBM50							Thit_1132	Tmath_1187	ThesiDRAFT1_2352
	CBM50,CBM50,CBM50,CBM50	Thebr_0459	TeCCSD1DRAFT_1959	Teth39_0446	Thet_1992	Teth514_0925	Teth561DRAFT_1932	Thit_1927	Tmath_1889	ThesiDRAFT1_0711	TthWC1_2241	Thewi_00001910
Multi-Component Proteins3	GH13,CBM20	Thebr_0690		Teth39_0672				Thit_2008	Tmath_1952
	CBM34,GH13	Thebr_0694	TeCCSD1DRAFT_17784	Teth39_0676	Thet_1723	Teth514_1187	Teth561DRAFT_0544	Thit_1637	Tmath_1627	ThesiDRAFT1_0433	TthWC1_1714	Thewi_00026720
			TeCCSD1DRAFT_17794
	CBM34-GH13-CBM20	Thebr_2219	TeCCSD1DRAFT_2062	Teth39_2173							TthWC1_2432
	CBM34-GH13-CBM20-SLH-SLH-SLH				Thet_0070	Teth514_1781	Teth561DRAFT_2166	Thit_0062	Tmath_0121	ThesiDRAFT1_1347		Thewi_00008490
	CBM22-CBM22-GH10-CBM9-CBM9-SLH-SLH-SLH							Thit_0192	Tmath_0251		TthWC1_1010
	GH66-CBM35-CBM35-GH15									ThesiDRAFT1_0902	TthWC1_0529
	GT84,GH94	Thebr_0518		Teth39_0505	Thet_1935	Teth514_0980	Teth561DRAFT_0254	Thit_1831	Tmath_1807	ThesiDRAFT1_0648	TthWC1_2397	Thewi_00000170
1GTnc are non-classified glycosyl transferases
2CBM proteins for T. pseudethanolicus 39E and Thermoanaerobacter sp. X514 are not listed in the CAZy database, but were identified via orthology to other Thermoanaerobacter genes. The sequences identified all shared >98% amino acid sequence identity with other CAZyme designated genes.
3Not a recognized class of enzymes within CAZy. Used to eliminate redundancy by classifying identical locus tags into multiple classes.
4Potential gene fragments. May not represent complete or true CDSs.
